# Supplementary material for: Comparing the Effects of Different Unsaturated Fatty Acids on Fermentation Performance of Saccharomyces cerevisiae and Aroma Compounds during Red Wine Fermentation
Source: Molecules. 2019 Feb 1;24(3):538. doi: 10.3390/molecules24030538 (PMC6384975; doi:10.3390/molecules24030538)
Supplement: Supplementary file 1 [file molecules-24-00538-s001.zip › Supplementary Tables-0129.xlsx]

## Sheet: Table S1
Table S1. Effect of UFAs on the concentration (μg/l) of volatile compounds in wines with different treatments.
	Controla	OA_12	OA_60	OA_120	OA_240	LA_12	LA_60	LA_120	LA_240	ALA_12	ALA_60	ALA_120	ALA_240	Threshold(μg/L)
1-Hexanol	1256.89±69.46ab	1136.13±20.43b	1129.19±105.14b	1368.59±72.87c	1611.58±66.53d	1075.53±38.95b	1465.95±115.22e	1590.73±81.06d	1835.05±49.36fg	1479.86±109.22e	1783.27±78.52f	1890.39±40.73g	2127.22±43.89h	1100
(E)-3-Hexen-1-ol	8.41±0.92ab	7.77±0.94ac	7.57±0.78ac	9.91±0.86df	11±1.3e	7.08±0.98c	7.59±0.43ac	8.04±0.37a	9.12±0.55bd	7.7±0.46ac	8.39±0.22ab	9.18±0.41bd	10.37±0.44fe	1000
(Z)-3-Hexen-1-ol	57.81±3.43ab	52.31±5.48a	64.61±7.77bc	65.22±6.22bc	70.79±10.11cd	54.61±6.88a	54.68±6.02a	64.9±4bc	60.31±4.05ab	58.08±6.41ab	75.6±8.32cd	81.65±10.88e	111.74±11.05f	1000
Isobutyl alcohol	23939.73±2565.67a	32722.55±2177.87def	28811.01±2104.83bc	26381.28±2159.28ab	24851.33±3975.28a	31941.36±4245.46cde	33972.01±4383.86def	34917.66±3551.57ef	36309.93±1728.27fg	30461.47±2124.92cd	45343.06±3565.38h	46938.09±2618.67h	39169.43±1366.98g	40000
Isoamyl alcohol	110849.62±1957.41a	135518.74±3346.15d	119524.54±9335.83bc	120675.97±5881.35bc	108734.36±12052.84a	125230.99±8000.08ce	132984.12±11181.52cd	132206.11±8293.26cd	133846.08±3135.22cd	112269.01±3595.29ab	138214.78±4869.68df	146172.16±6205.55f	120308.84±1414.83bc	60000
1-Octanol	6.78±1.88a	41.74±2.06c	27.51±2.52b	6.66±0.61a	9.58±0.97de	12.5±0.9fg	29.06±3.8b	9.14±0.45ade	11.11±0.32e	23.43±0.53h	24.02±1.57h	13.98±0.8g	8.44±0.29ad	800
1-Decanol	4.18±0.17a	2.76±0.06d	4.81±0.33bc	4.49±0.42ab	5.1±0.43ce	5.55±0.23f	4.25±0.26a	4.41±0.16ab	4.8±0.24bc	4.23±0.23a	4.33±0.07a	5.46±0.17ef	5.26±0.7ef	400
Benzyl alcohol	23737.84±2301.13abc	23430.32±2137.34ab	20522.6±1373ab	28752.24±4250.36c	35872.69±4511.06d	12122.49±702.7e	18777.44±2703.61a	24647.69±3657.68bc	41324.9±6989.24f	23131.43±3655.21ab	23921.25±2225.51abc	39209.51±6191df	43383.94±893.38f	200000
Phenylethyl alcohol	30434.27±2758.86a	51326.73±4158.3d	29152.49±2705.24a	32483.35±5077.85a	31841.43±5345.04a	47467.89±6494bcd	27494.39±4257.4a	29707.4±4002.48a	42054.58±6133.06b	33433.61±4270.32a	32968.06±3436.84a	44992.1±5629bc	48798.22±2989.71cd	10000
2,3-Butanediol	61033.15±7389.01a	25459.97±3578.8de	41267.75±980.9ab	84991.7±13251.31abc	224498.37±16289.31abc	14835.43±1762.26bc	53320.44±9516.33abc	120363.06±16606.16cd	157280.25±11913.68ef	107655.29±9863.62ab	108452.09±14849.56de	260184.87±23157.11f	410854.29±71009.12ef	150000
Isoamyl acetate	1129.26±111.82a	2357.91±113.73d	1534.81±213.87e	860.72±51.71b	277.87±53.28c	1779.43±150.93e	1725±245.72e	816.92±94.9f	420.05±25.53c	955.4±85.09f	764.7±58.99c	283.78±34.86g	109.24±6.09h	160
Hexyl acetate	88.21±6.88a	140.77±8.52g	105.86±8.95bc	73.76±4.41b	32.65±2.51def	107.02±5.66bc	105.4±9.1c	59.52±5.61b	38.4±3.07ah	61.64±5.33adh	39.19±5.24ade	12.46±1.86ef	3.4±0.17f	1500
Phenethyl acetate	122.27±2.52a	283.08±13.87cdef	190.08±19.09c	92.89±7.87c	10.4±1.62b	245.56±15.89g	143.46±23.74cd	72.18±8.35cde	26.78±2.19a	120.09±3.99ef	86.64±5.34f	35.2±7.75def	4.84±0.69a	1800
Hexanoic acid	382.79±24.65a	501.07±42.95e	390.51±22.53b	321.64±38.18c	272.43±32.13d	437.78±28.69f	1436.31±75.19h	283.45±17.91c	326.3±55.43i	411.21±47.03g	292.06±16.56ah	286.59±38.03i	226.3±24.9d	420
Octanoic acid	4314.88±283.14a	9052.14±701.3a	5940.67±310.94a	2791.26±441.23bc	542.19±78.92bd	12053.81±992.73a	5099.42±865.8c	3068.75±272.93bc	1491.29±199.93bc	6991.72±967.05c	4821.84±338.84bc	1812.01±293.43bd	547.72±59.67d	500
Decanoic acid	1422.25±112.22ab	1709.05±128.83b	1762.87±213.24ce	873.34±93.5c	196.93±17.05d	3806.07±503.47f	1662.9±263.58a	863.39±76.72e	399.8±15.47ce	2160.52±358.57e	1881.66±220.53ab	695.47±39.08c	251.53±34.84d	1000
Dodecanoic acid	375.62±33.34a	437.37±65.27d	266.79±36.54f	207.79±23.01b	116.39±8.19c	553.15±103.85e	366.79±56.62f	287.09±22.1b	254.37±26.55g	287.89±43.12h	420.15±67.78i	207.05±26.88g	118.54±17.78c	1000
Ethyl butanoate	300.45±19.93ab	285.82±17.63d	283.53±28.46a	218.13±12.35f	121.8±10.64c	239.17±16.18b	258.29±39.53e	233.96±15.34f	181.28±12.88h	267.73±20.2e	221.64±19.09g	141.59±8.84c	85.09±4.74i	20
Ethyl hexanoate	893.22±59.86ab	1071.86±82.07d	836.06±50.74ac	566.85±42.86ab	197.78±31c	950.85±101.03d	717.64±71.67ef	550.87±26.62g	303.02±19.22ef	746.63±51.2abe	484.58±30.61fg	194.58±18.95bcf	66.96±8.87bef	80
Ethyl octanoate	4933.47±144.03abc	3666.78±264.32gh	4915.32±386.24c	3757.07±293.68abd	1421.96±78.61de	2985.98±238.29h	3594.43±153.91ad	2951.63±225.05f	1455.44±85.04gh	4079.31±141.7abd	3187.67±205.3bc	1573.93±60.88f	652.94±76.81ef	580
Ethyl decanoate	5925.35±176a	4207.53±313.06b	6124.83±562.61bc	5711.21±446.84e	2076.32±245.92c	3171.94±249.04d	5140.29±567.18f	4431.48±371.47f	2599.89±191.33a	4983.58±169.34b	5016.23±311.49e	2793.72±147.2b	1300.84±87.29d	200
Ethyl dodecanoate	393.33±18.84a	309.3±24.89g	280.22±23.51bc	440.69±35.49a	245.95±21.83cd	141.4±23.76fg	501.71±43.62a	503.58±31.3a	360.48±10.9b	288.6±41.36de	434.98±53.97def	298.64±16.7ef	145.51±6.83g	1500
Ethyl tetradecanoate	12.05±1.1a	8.13±0.38d	10.41±0.53a	11.95±0.86a	9.8±0.61bc	8.42±1.02e	12.29±0.49bc	11.87±0.42c	11.02±0.22c	9.66±0.54b	9.16±0.52bc	8.93±0.48g	7.94±0.32f	2000
Ethyl hexadecanoate	32.33±1.71a	12.89±1.71a	32.06±3.77a	32.2±1.45b	25.39±3.18a	15.66±1.62c	25.15±1.41a	23.99±1.07a	24.69±1.63a	27.53±1.79b	25.42±0.81b	21.57±1.63a	18.36±0.89a	1000
Ethyl octadecanoate	5.61±0.09abc	5.75±0.22g	5.67±0.16fg	5.96±0.13de	5.75±0.17abf	5.31±0.11h	5.67±0.09af	5.76±0.09bcd	5.73±0.09abf	5.93±0.1bcd	5.92±0.06e	5.72±0.1cde	5.63±0.13af
Methyl octanoate	4.07±0.35a	3.82±0.38i	4.28±0.31a	2.57±0.21b	0.99±0.09c	3.2±0.36bd	3.25±0.35de	2.5±0.2ef	1.31±0.07g	4.62±0.75de	2.45±0.11cf	1.26±0.1g	0.6±0.06h	200
Methyl salicylate	1.33±0.08ab	1.55±0.11d	1.49±0.2bd	1.43±0.16abd	0.86±0.1c	1.05±0.07e	1.59±0.19d	1.31±0.18a	1.04±0.12e	0.9±0.1ce	0.92±0.13ce	0.41±0.06f	0.48±0.04f
Propyl octanoate	1.78±0.01ae	1.83±0.03bce	2.03±0.1d	1.85±0.06bc	1.4±0.04h	1.57±0.05f	1.88±0.06c	1.76±0.06a	1.47±0.03g	1.81±0.03abce	1.78±0.06abe	1.52±0.03fg	1.4±0.04h
Isobutyl octanoate	2.26±0.05a	3.78±0.14d	2.95±0.21b	2.35±0.1ae	1.62±0.03c	3.06±0.19b	2.98±0.29b	2.44±0.07ef	1.9±0.06h	2.55±0.07fg	2.66±0.07g	1.87±0.05h	1.5±0.03c
Isoamyl hexanoate	4±0.2ad	4.22±0.19bc	3.92±0.22abc	3.45±0.24de	2.64±0.18g	3.33±0.4c	3.18±0.16ab	2.97±0.08ef	2.4±0.03f	3.15±0.12e	2.81±0.08e	2.37±0.05h	1.95±0.08i
Isoamyl octanoate	11.73±1.02a	25.2±1.92f	18.12±2.22b	14.22±2.07c	4.78±0.36d	16.49±2e	17.02±0.68be	13.03±0.8ac	6.71±0.42g	13.53±0.85c	12.73±0.78ac	6.12±0.38dg	3.06±0.12h	125
Isoamyl decanoate	16.97±2.4a	17.92±1.18ah	26.37±4.23b	23.32±1.72cd	6.52±0.85e	24.21±2.81bd	29.89±2.18f	19.65±1.35gh	10.81±0.77i	21.39±1.35cg	29.68±2.65f	12.15±1.24i	4.65±0.19e
β-Damascenone	4.66±0.33a	5.89±0.11f	5.11±0.35bc	4.51±0.21ad	3.89±0.17e	6.77±0.27g	5.37±0.67bc	4.53±0.29ad	3.93±0.21e	5.49±0.5cf	5.06±0.33b	4.18±0.37de	4.05±0.19e	0.05
Citronellol	0.44±0abc	0.44±0abc	0.44±0.01abc	0.44±0.01ab	0.44±0.02abc	0.45±0.02c	0.44±0.01abc	0.44±0.01abc	0.47±0.02d	0.43±0.01a	0.45±0bc	0.48±0.01d	0.49±0.02e	100
4-Terpineol	40.01±1.54a	37.79±1.22abc	38.3±1.83abc	38.57±2.13abc	36.72±2.4cd	32.37±0.96e	38.57±1.98abc	37.44±1.24bc	34.93±1.66d	39.12±1.09ab	39.76±1.71a	34.91±2.36d	35.29±1.47d	250
3-(Methylthio)-1-propanol	531.13±85.46a	804.35±83.42d	379.52±53.4bc	367.92±47.17bc	348.25±44.16bc	767.62±127d	365.37±68.26bc	308.97±40.71c	388.81±50.03bc	395.17±62.34bc	375.39±46.29bc	442.58±48.97ab	388.61±31.1bc	1000
a Control, 12 mg/L oleic acid addition (OA_12), 60 mg/L oleic acid addition (OA_60), 120 mg/L oleic acid addition (OA_120), 240 mg/L oleic acid addition (OA_240), 12 mg/L linoleic acid addition (LA_12), 60 mg/L linoleic acid addition (LA_60), 120 mg/L linoleic acid addition (LA_120), 240 mg/L linoleic acid addition (LA_240), 12 mg/L α linolenic acid addition (ALA_12), 60 mg/L α linolenic acid add…
b Values (mean ± SD, n = 3) of the same parameter (compound) followed with the same lowercase letters indicate no significant difference (P< 0.05, Duncan’s test). Trace means the compounds could not be quantified. Bold numbers indicate the concentration is above its threshold.

## Sheet: Table S2
Table S2. Description of genes detected in this work.
Gene name	Open reading frame (ORF)	Description	F	R
Amino acid transportation
GAP1	YKR039W	General amino acid permease	CTGGTGACACTCCAGGTGCT	ACTGGCAGCAAGACCAACCA
BAP2	YBR068C	Leucine permease	TGGTCCTGCTGCGCTAGTAATTG	AGTCGGATAGGTTACCGCCATCTC
Aroma compound synthesis
BAT1	YHR208W	Mitochondrial branched-chain amino acid aminotransferase	ATTGGCTCGTGACAAACTAGATCCT	CCGAAGGCTTCTAATAGTTCACCTT
BAT2	YJR148W	Cytosolic branched-chain amino acid aminotransferase	TGGACCATTAGTGAACGCTACTTC	ACAATCGCAGCAGTACCAGAAC
PDC1	YLR044C	Pyruvate decarboxylase	GCAAGAAGGTGATGTTGTCATTGC	ACTTGAGAGATACCGTAGGTGTTG
PDC5	YLR134W	Pyruvate decarboxylase	ACGGTCCTCATGCCGAATATAATG	CCATTCACCAGTGGTAGCAACTC
PDC6	YGR087C	Pyruvate decarboxylase	ACGTAAAGGTGAAGAACGCTACG	TTGGTTGGTACGGGAACGCT
ARO10	YDR380W	Phenylpyruvate decarboxylase	TTGCCATGCAAGACCACTCAA	TGCTGCACCGTCACCTTCAA
ADH1	YOL086C	Alcohol dehydrogenase	GCTGGTGCCAAGTGTTGTTCT	GCTTCTCTGGTGTCAGCTCTGTT
Fatty acid metabolism
FAT3	YKL187C	Protein required for fatty acid uptake	ATTGCCGCTGATCGCTAAGG	CGCTGACGCCGCTATTGAC
ACC1	YNR016C	Acetyl-CoA carboxylase	AAGGTCGCTCTACAAGCAAGAG	TGAGCCATAGGCAACCTTCAC
FAS1	YKL182W	Fatty acid synthetase	TGCTAGATTGGCCGGAAAGTACA	TCGATGATTTCCTTGATAGGTTCGG
FAS2	YPL231W	Fatty acid synthetase	TCAGAGCCGTGTCCATCACTTC	TGGCGACATACTCGTTGTATCTG
OLE1	YGL055W	Delta(9) fatty acid desaturase	GGTATTGTTCACGACGTATCTGGTT	GCCTTGGTAGCGTCCTTACCT
ELO1	YJL196C	Medium-chain acyl elongase	GCAGTTCATGCTTGATCTCATTGTC	CAATCCTCACACTGTGGAGTACAAG
Ester metabolism
ATF1	YOR377W	Alcohol acetyltransferase	GGACCGAGTTGGCGGCTAAT	GTGGATCGAAGACCGACCATCA
IAH1	YOR126C	Isoamyl acetate-hydrolyzing esterase	CCGTACCAACGAGAACTTTGCC	GCCAAGCATCACCACCTTCC
EEB1	YPL095C	Acyl-coenzymeA:ethanol O-acyltransferase	AGCCATGAGCCTCTCATCAGG	TGAGCAACCTCTAGCATTAAGGAC
EHT1	YBR177C	Acyl-coenzymeA:ethanol O-acyltransferase	ACCGCTGACTGGCTCATAGATTC	ATGTGTCGCCTTCTCGTCTTC
ACT1	YFL039C	Actin	TCTGAGGTTGCTGCTTTGGT	GGTGTCTTGGTCTACCGACGAT
PDA1	YER178W	Pyruvate dehydrogenase alpha	CTCCAGGCTTCTATGGTGGTAATGG	AGAGCAGGCGTCTTCGTTCTTG

## Sheet: Table S3
Table S3. Calibration curves for quantification of glycerol, ethanol, citric acid, malic acid, succinic acid, lactic acid and acetic acid in this study.
Compound	CAS	Calibration curves a	R2 b	Method quantitation limit (g/L)
Glycerol	56815	y=4E-06x-0.0241	0.9999	0.2
Ethanol	64175	y=1E-06x+0.1128	0.9998	0.4 %v/v
Acetic acid	64197	y=2E-03x-0.0113	0.9998	0.04
Citric acid	77929	y=6E-04x-0.0087	0.9999	0.02
Succinic acid	110156	y=1E-03x-0.0082	0.9998	0.01
Malic acid	6915157	y=6E-04x-0.0822	0.9997	0.16
a y, concentration in mg/l; x, peak area of amino acid.
b R, regression coefficient.

## Sheet: Table S4
Table S4. Quantitative ion, quantitative standards and calibration curves for quantification of fatty acids in this study.
Compound	CAS	RI a	Quantitative ion b (m/z)	Quantitative standards	ID c	Calibration curves d	R² e	Method quantitation limit (mg/L)
Dodecanoic acid	143077	1002	74	Dodecanoic acid	A	y=3.802x-0.084	0.96	0.079
Tetradecanoic acid	544638	1106	74	Tetradecanoic acid	A	y=4.128x-0.085	0.979	0.049
Hexadecanoic acid	57103	1149	74	Hexadecanoic acid	A	y=5.252x-1.063	0.991	0.127
Octadecanoic acid	57114	1202	74	Octadecanoic acid	A	y=4.725x-0.416	0.995	0.031
Oleic acid	112801	1211	55	Oleic acid	A	y=12.41x-0.546	0.996	0.09
Linoleic acid	60333	1224	67	Linoleic acid	A	y=12.31x+0.108	0.999	0.186
Linolenic aicd	463401	1246	79	Linolenic aicd	A	y=12.43x-0.397	0.997	0.03
Eicosanoic acid	506309	1266	74	Eicosanoic acid	A	y=5.687x-0.066	0.962	0.02
Docosanoic acid	112856	1363	74	Docosanoic acid	A	y=6.670x-0.546	0.952	0.017
a Retention indices were calculated on an HP-INNOWAX column.
b Quantitative ion for peak area evaluation of fatty acids.
c Identification of volatile compounds: A, identified by mass spectrum and RI agreed with standards; B, identified by mass spectrum agrees with the mass spectral database and RI agrees with literature.
d y, concentration in μg/L; x, peak area ratio of a compound to the internal standard (Nonadecanoic acid).
e Regression coefficient.

## Sheet: Table S5
Table S5. Quantitative ion, quantitative standards and calibration curves for quantification of volatile compounds in this study.
Compound	CAS	RI a	Quantitative ion b (m/z)	Quantitative standards	ID c	Calibration curves d	R² e	Method quantitation limit (μg/L)
1-Hexanol	111273	1354	56	1-Hexanol	A	y=2494.27x+22.29	0.998	2.516
(E)-3-Hexen-1-ol	928972	1360	41	(E)-3-Hexen-1-ol	A	y=501.29x+2.64	0.992	0.198
(Z)-3-Hexen-1-ol	928961	1381	67	(Z)-3-Hexen-1-ol	A	y=8163.18x+26.86	0.997	0.504
Isobutyl alcohol	78831	1111	43	Isobutyl alcohol	A	y=26107.24x+1550.13	0.999	108.398
Isoamyl alcohol	123513	1220	55	Isoamyl alcohol	A	y=13812.49x-1321.38	0.999	71.172
1-Octanol	111875	1558	56	1-Octanol	A	y=511.60x-1.35	0.984	0.131
1-Decanol	112301	1765	70	1-Decanol	A	y=173.45x+1.59	0.997	0.295
Benzyl alcohol	100516	1891	79	Benzyl alcohol	A	y=424654.7x-546.04	0.965	2.08
2-Phenylethanol	60128	1928	91	2-Phenylethanol	A	y=11861.14x+254.13	0.997	10.547
2,3-Butanediol	513859	1542	45	2,3-Butanediol	A	y=261.3x+78.86	0.998	219.849
Isoamyl acetate	123922	1122	43	Isoamyl acetate	A	y=283.54x-108.63	0.995	2.82
Hexyl acetate	142927	1275	43	Hexyl acetate	A	y=102.43x-6.98	0.996	0.752
Phenethyl acetate	103457	1830	104	Phenethyl acetate	A	y=195.05x-11.15	0.992	0.223
Hexanoic acid	142621	1860	60	Hexanoic acid	A	y=880.99x+19.41	0.986	3.223
Octanoic acid	124072	2075	60	Octanoic acid	A	y=4598.59x-429.53	0.922	3.906
Decanoic acid	334485	2292	60	Decanoic acid	A	y=2035.66x+41.34	0.997	4.399
Dodecanoic acid	143077	1244	73	Dodecanoic acid	A	y=9500.36x+23.51	0.994	4.16
Ethyl butanoate	105544	1047	71	Ethyl butanoate	A	y=1027.48x+5.47	0.999	0.669
Ethyl hexanoate	123660	1232	88	Ethyl hexanoate	A	y=232.00x-135.27	0.997	10.469
Ethyl octanoate	106321	1437	88	Ethyl octanoate	A	y=132.31x-274.07	0.997	0.42
Ethyl decanoate	110383	1639	88	Ethyl decanoate	A	y=135.15x-462.83	0.967	49.385
Ethyl dodecanoate	106332	1830	88	Ethyl dodecanoate	A	y=53.45x+4.75	0.982	1.343
Ethyl tetradecanoate	124061	2050	88	Ethyl dodecanoate	B	y=53.45x+4.75	0.982	1.343
Ethyl hexadecanoate	628977	2238	88	Ethyl dodecanoate	B	y=53.45x+4.75	0.982	1.343
Ethyl octadecanoate	111615	2415	88	Ethyl dodecanoate	B	y=53.45x+4.75	0.982	1.343
Methyl octanoate	111115	1394	74	Methyl octanoate	A	y=33.42x+0.05	0.997	0.134
Methyl salicylate	119368	1795	120	Methyl salicylate	A	y=575.47x-0.96	0.997	0.394
Propyl octanoate	624135	1524	43	Ethyl octanoate	B	y=132.31x-274.07	0.997	0.42
Isobutyl octanoate	5461063	1557	57	Isoamyl hexanoate	B	y=32.09x+1.11	0.99	0.488
Isoamyl hexanoate	2198610	1482	70	Isoamyl hexanoate	A	y=32.09x+1.11	0.99	0.488
Isoamyl octanoate	2035996	1665	70	Isoamyl hexanoate	B	y=32.09x+1.11	0.99	0.488
Isoamyl decanoate	2306914	1727	70	Isoamyl hexanoate	B	y=32.09x+1.11	0.99	0.488
β-Damascenone	23726934	1835	69	β-Damascenone	A	y=148.66x+1.44	0.999	0.142
Citronellol	106229	1771	69	Citronellol	A	y=8.88x+0.35	0.995	0.032
4-Terpineol	20126765	1610	71	4-Terpineol	A	y=506.14x+1.98	0.991	0.233
3-(Methylthio)-1-propanol	505102	1724	106	3-(Methylthio)-1-propanol	A	y=57644.86x-46.05	0.993	1.282
a Retention indices were calculated on an HP-INNOWAX column.
b Quantitative ion for peak area evaluation of volatile compounds.
c Identification of volatile compounds: A, identified by mass spectrum and RI agreed with standards; B, identified by mass spectrum agrees with the mass spectral database and RI agrees with literature.
d y, concentration in μg/L; x, peak area ratio of a compound to the internal standard (4-methyl-2-pentanol).
e Regression coefficient.

## Sheet: Table S6
Table S6. Time of sampling of the alcoholic fermentation for Real-time PCR.
Treatmentsa	Mid-exponential			Early-stationary			Late-stationary
	Fermentation time (h)	Ethanol (% v/v)	Sugar consumption (%)	Fermentation time (h)	Ethanol (% v/v)	Sugar consumption (%)	Fermentation time (h)	Ethanol (% v/v)	Sugar consumption (%)
Control	36	ND	23	60	4.6	50	84	10.1	79
OA_12	12	ND	24	24	3.7	52	60	9.1	81
OA_60	24	ND	22	48	4.2	54	72	10.3	81
OA_120	48	ND	23	60	5.9	52	84	11.1	79
OA_240	60	ND	22	84	6	51	180	14.2	79
LA_12	12	ND	24	24	3.9	49	48	7.1	80
LA_60	24	ND	21	48	4.1	51	72	10.6	81
LA_120	36	ND	23	60	5.1	51	84	11.2	79
LA_240	36	ND	20	84	4.6	50	180	11.3	80
ALA_12	24	ND	23	48	4.1	52	72	9.7	82
ALA_60	24	ND	21	48	4.1	51	72	10.2	79
ALA_120	36	ND	20	72	4.8	50	84	10.9	79
ALA_240	72	ND	22	84	5.9	49	180	13.4	82
a Control, 12 mg/L oleic acid addition (OA_12), 60 mg/L oleic acid addition (OA_60), 120 mg/L oleic acid addition (OA_120), 240 mg/L oleic acid addition (OA_240), 12 mg/L linoleic acid addition (LA_12), 60 mg/L linoleic acid addition (LA_60), 120 mg/L linoleic acid addition (LA_120), 240 mg/L linoleic acid addition (LA_240), 12 mg/L α linolenic acid addition (ALA_12), 60 mg/L α linolenic acid add…
